# Supplementary material
Source: publisher figshare collection journal article supplement (https://acs.figshare.com/ndownloader/files/4088713)
Supplement: Supplementary file 1 [file 4088713]

#==============================================================================  


 
data_0426am 
 
_audit_creation_method            SHELXL-97 
_chemical_name_systematic 
; 
 ? 
; 
_chemical_name_common             ? 
_chemical_melting_point           ? 
_chemical_formula_moiety          ? 
_chemical_formula_sum 
 'C18 H26 Cu F12 N12 Ti2' 
_chemical_formula_weight          797.85 
 
loop_ 
 _atom_type_symbol 
 _atom_type_description 
 _atom_type_scat_dispersion_real 
 _atom_type_scat_dispersion_imag 
 _atom_type_scat_source 
 'C'  'C'   0.0033   0.0016 
 'International Tables Vol C Tables 4.2.6.8 and 6.1.1.4' 
 'H'  'H'   0.0000   0.0000 
 'International Tables Vol C Tables 4.2.6.8 and 6.1.1.4' 
 'N'  'N'   0.0061   0.0033 
 'International Tables Vol C Tables 4.2.6.8 and 6.1.1.4' 
 'F'  'F'   0.0171   0.0103 
 'International Tables Vol C Tables 4.2.6.8 and 6.1.1.4' 
 'Ti'  'Ti'   0.2776   0.4457 
 'International Tables Vol C Tables 4.2.6.8 and 6.1.1.4' 
 'Cu'  'Cu'   0.3201   1.2651 
 'International Tables Vol C Tables 4.2.6.8 and 6.1.1.4' 
 
_symmetry_cell_setting            Tetragonal
_symmetry_space_group_name_H-M    'I 4/m m m' 
 
loop_ 
 _symmetry_equiv_pos_as_xyz 
 'x, y, z' 
 '-x, -y, z' 
 '-y, x, z' 
 'y, -x, z' 
 '-x, y, -z' 
 'x, -y, -z' 
 'y, x, -z' 
 '-y, -x, -z' 
 'x+1/2, y+1/2, z+1/2' 
 '-x+1/2, -y+1/2, z+1/2' 
 '-y+1/2, x+1/2, z+1/2' 
 'y+1/2, -x+1/2, z+1/2' 
 '-x+1/2, y+1/2, -z+1/2' 
 'x+1/2, -y+1/2, -z+1/2' 
 'y+1/2, x+1/2, -z+1/2' 
 '-y+1/2, -x+1/2, -z+1/2' 
 '-x, -y, -z' 
 'x, y, -z' 
 'y, -x, -z' 
 '-y, x, -z' 
 'x, -y, z' 
 '-x, y, z' 
 '-y, -x, z' 
 'y, x, z' 
 '-x+1/2, -y+1/2, -z+1/2' 
 'x+1/2, y+1/2, -z+1/2' 
 'y+1/2, -x+1/2, -z+1/2' 
 '-y+1/2, x+1/2, -z+1/2' 
 'x+1/2, -y+1/2, z+1/2' 
 '-x+1/2, y+1/2, z+1/2' 
 '-y+1/2, -x+1/2, z+1/2' 
 'y+1/2, x+1/2, z+1/2' 
 
_cell_length_a                    10.1096(5) 
_cell_length_b                    10.1096(5) 
_cell_length_c                    15.8515(16) 
_cell_angle_alpha                 90.00 
_cell_angle_beta                  90.00 
_cell_angle_gamma                 90.00 
_cell_volume                      1620.1(2) 
_cell_formula_units_Z             2 
_cell_measurement_temperature     293(2) 
_cell_measurement_reflns_used     ? 
_cell_measurement_theta_min       ? 
_cell_measurement_theta_max       ? 
 
_exptl_crystal_description        block 
_exptl_crystal_colour             'grayish blue' 
_exptl_crystal_size_max           0.48 
_exptl_crystal_size_mid           0.36 
_exptl_crystal_size_min           0.33 
_exptl_crystal_density_meas       ? 
_exptl_crystal_density_diffrn     1.636 
_exptl_crystal_density_method     'not measured' 
_exptl_crystal_F_000              798 
_exptl_absorpt_coefficient_mu     1.232 
_exptl_absorpt_correction_type    multi-scan 
_exptl_absorpt_correction_T_min   0.5894 
_exptl_absorpt_correction_T_max   0.6867 
_exptl_absorpt_process_details    ? 
 
_exptl_special_details 
; 
 ? 
; 
 
_diffrn_ambient_temperature       293(2) 
_diffrn_radiation_wavelength      0.71073 
_diffrn_radiation_type            MoK\a 
_diffrn_radiation_source          'fine-focus sealed tube' 
_diffrn_radiation_monochromator   graphite 
_diffrn_measurement_device_type   ? 
_diffrn_measurement_method        ? 
_diffrn_detector_area_resol_mean  ? 
_diffrn_standards_number          ? 
_diffrn_standards_interval_count  ? 
_diffrn_standards_interval_time   ? 
_diffrn_standards_decay_%         ? 
_diffrn_reflns_number             5363 
_diffrn_reflns_av_R_equivalents   0.0303 
_diffrn_reflns_av_sigmaI/netI     0.0153 
_diffrn_reflns_limit_h_min        -13 
_diffrn_reflns_limit_h_max        12 
_diffrn_reflns_limit_k_min        -13 
_diffrn_reflns_limit_k_max        11 
_diffrn_reflns_limit_l_min        -17 
_diffrn_reflns_limit_l_max        20 
_diffrn_reflns_theta_min          2.39 
_diffrn_reflns_theta_max          27.78 
_reflns_number_total              573 
_reflns_number_gt                 510 
_reflns_threshold_expression      >2sigma(I) 
 
_computing_data_collection        ? 
_computing_cell_refinement        ? 
_computing_data_reduction         ? 
_computing_structure_solution     'SHELXS-97 (Sheldrick, 1990)' 
_computing_structure_refinement   'SHELXL-97 (Sheldrick, 1997)' 
_computing_molecular_graphics     ? 
_computing_publication_material   ? 
 
_refine_special_details 
; 
 Refinement of F^2^ against ALL reflections.  The weighted R-factor wR and 
 goodness of fit S are based on F^2^, conventional R-factors R are based 
 on F, with F set to zero for negative F^2^. The threshold expression of 
 F^2^ > 2sigma(F^2^) is used only for calculating R-factors(gt) etc. and is 
 not relevant to the choice of reflections for refinement.  R-factors based 
 on F^2^ are statistically about twice as large as those based on F, and R- 
 factors based on ALL data will be even larger. 
; 
 
_refine_ls_structure_factor_coef  Fsqd  
_refine_ls_matrix_type            full 
_refine_ls_weighting_scheme       calc  
_refine_ls_weighting_details 
 'calc w=1/[\s^2^(Fo^2^)+(0.0663P)^2^+2.6050P] where P=(Fo^2^+2Fc^2^)/3' 
_atom_sites_solution_primary      direct 
_atom_sites_solution_secondary    difmap 
_atom_sites_solution_hydrogens    geom 
_refine_ls_hydrogen_treatment     constr 
_refine_ls_extinction_method      none 
_refine_ls_extinction_coef        ? 
_refine_ls_number_reflns          573 
_refine_ls_number_parameters      63 
_refine_ls_number_restraints      24 
_refine_ls_R_factor_all           0.0484 
_refine_ls_R_factor_gt            0.0434 
_refine_ls_wR_factor_ref          0.1334 
_refine_ls_wR_factor_gt           0.1269 
_refine_ls_goodness_of_fit_ref    1.147 
_refine_ls_restrained_S_all       1.146 
_refine_ls_shift/su_max           0.000 
_refine_ls_shift/su_mean          0.000 
 
loop_ 
 _atom_site_label 
 _atom_site_type_symbol 
 _atom_site_fract_x 
 _atom_site_fract_y 
 _atom_site_fract_z 
 _atom_site_U_iso_or_equiv 
 _atom_site_adp_type 
 _atom_site_occupancy 
 _atom_site_symmetry_multiplicity 
 _atom_site_calc_flag 
 _atom_site_refinement_flags 
 _atom_site_disorder_assembly 
 _atom_site_disorder_group 
C2 C 0.2859(4) 0.2859(4) 0.0447(5) 0.081(14) Uani 0.50 2 d SPD . 1 
N5 N 0.2863(4) 0.2863(4) 0.0441(5) 0.081(12) Uani 0.50 2 d SPD . 2 
H2 H 0.3346 0.3346 0.0765 0.11(2) Uiso 1 2 calc SR . 2 
Cu1 Cu 0.0000 0.0000 0.0000 0.0384(4) Uani 1 16 d S . . 
Ti1 Ti 1.0000 1.0000 0.27423(8) 0.0438(4) Uani 1 8 d S . . 
N1 N 0.1403(2) 0.1403(2) 0.0000 0.0426(10) Uani 1 4 d SD . . 
F2 F 0.87161(18) 0.87161(18) 0.27478(15) 0.0590(7) Uani 1 2 d S . . 
F1 F 1.0000 1.0000 0.1592(3) 0.0530(11) Uani 1 8 d S . . 
F3 F 1.0000 1.0000 0.3894(3) 0.0831(19) Uani 1 8 d S . . 
C1 C 0.1965(3) 0.1965(3) 0.06836(18) 0.0677(13) Uani 1 2 d SD . . 
H1 H 0.1759 0.1759 0.1240 0.10(2) Uiso 1 2 calc SR . 1 
C10 C -0.011(4) 0.391(2) 0.2171(16) 0.075(4) Uani 0.13 1 d PD A -1 
H10A H -0.0211 0.3054 0.1958 0.090 Uiso 0.13 1 calc PR A -1 
C11 C 0.081(5) 0.577(5) 0.268(3) 0.075(4) Uani 0.13 1 d PD A -1 
H11A H 0.1429 0.6381 0.2864 0.090 Uiso 0.13 1 calc PR A -1 
C12 C -0.054(5) 0.599(2) 0.257(3) 0.075(4) Uani 0.13 1 d PD A -1 
H12 H -0.0978 0.6778 0.2687 0.090 Uiso 0.13 1 calc PR A -1 
N10 N -0.110(2) 0.484(3) 0.227(2) 0.075(4) Uani 0.13 1 d PD A -1 
H10 H -0.1927 0.4725 0.2157 0.090 Uiso 0.13 1 calc PR A -1 
N11 N 0.106(2) 0.447(5) 0.245(3) 0.075(4) Uani 0.13 1 d PD A -1 
H11 H 0.1819 0.4076 0.2477 0.090 Uiso 0.13 1 calc PR A -1 
 
loop_ 
 _atom_site_aniso_label 
 _atom_site_aniso_U_11 
 _atom_site_aniso_U_22 
 _atom_site_aniso_U_33 
 _atom_site_aniso_U_23 
 _atom_site_aniso_U_13 
 _atom_site_aniso_U_12 
C2 0.094(18) 0.094(18) 0.055(15) -0.019(8) -0.019(8) -0.030(17) 
N5 0.055(9) 0.055(9) 0.13(3) -0.009(6) -0.009(6) -0.028(10) 
Cu1 0.0319(5) 0.0319(5) 0.0513(8) 0.000 0.000 0.000 
Ti1 0.0472(5) 0.0472(5) 0.0369(8) 0.000 0.000 0.000 
N1 0.0385(14) 0.0385(14) 0.051(2) 0.000 0.000 -0.0055(17) 
F2 0.0570(9) 0.0570(9) 0.0631(16) 0.0054(7) 0.0054(7) -0.0070(11) 
F1 0.0576(17) 0.0576(17) 0.044(2) 0.000 0.000 0.000 
F3 0.105(3) 0.105(3) 0.039(3) 0.000 0.000 0.000 
C1 0.072(2) 0.072(2) 0.060(3) -0.0031(14) -0.0031(14) -0.025(3) 
C10 0.050(8) 0.050(9) 0.125(11) 0.012(7) -0.004(10) 0.007(10) 
C11 0.050(8) 0.050(9) 0.125(11) 0.012(7) -0.004(10) 0.007(10) 
C12 0.050(8) 0.050(9) 0.125(11) 0.012(7) -0.004(10) 0.007(10) 
N10 0.050(8) 0.050(9) 0.125(11) 0.012(7) -0.004(10) 0.007(10) 
N11 0.050(8) 0.050(9) 0.125(11) 0.012(7) -0.004(10) 0.007(10) 
 
_geom_special_details 
; 
 All esds (except the esd in the dihedral angle between two l.s. planes) 
 are estimated using the full covariance matrix.  The cell esds are taken 
 into account individually in the estimation of esds in distances, angles 
 and torsion angles; correlations between esds in cell parameters are only 
 used when they are defined by crystal symmetry.  An approximate (isotropic) 
 treatment of cell esds is used for estimating esds involving l.s. planes. 
; 
 
loop_ 
 _geom_bond_atom_site_label_1 
 _geom_bond_atom_site_label_2 
 _geom_bond_distance 
 _geom_bond_site_symmetry_2 
 _geom_bond_publ_flag 
C2 H2 0.8595 . ? 
C2 C1 1.330(8) . ? 
C2 C2 1.419(16) 18 ? 
N5 C1 1.340(7) . ? 
N5 N5 1.397(15) 18 ? 
N5 H2 0.8600 . ? 
Cu1 N1 2.006(4) 17 ? 
Cu1 N1 2.006(4) . ? 
Cu1 N1 2.006(4) 3 ? 
Cu1 N1 2.006(4) 19 ? 
Ti1 F1 1.823(5) . ? 
Ti1 F3 1.826(5) . ? 
Ti1 F2 1.836(3) . ? 
Ti1 F2 1.836(3) 2_775 ? 
Ti1 F2 1.836(3) 4_575 ? 
Ti1 F2 1.836(3) 3_755 ? 
N1 C1 1.349(4) . ? 
N1 C1 1.349(4) 18 ? 
C1 H1 0.9300 . ? 
C10 N11 1.387(9) . ? 
C10 N10 1.388(9) . ? 
C10 H10A 0.9300 . ? 
C11 C12 1.388(9) . ? 
C11 N11 1.389(9) . ? 
C11 H11A 0.9300 . ? 
C12 N10 1.385(9) . ? 
C12 H12 0.9300 . ? 
N10 H10 0.8600 . ? 
N11 H11 0.8600 . ? 
 
loop_ 
 _geom_angle_atom_site_label_1 
 _geom_angle_atom_site_label_2 
 _geom_angle_atom_site_label_3 
 _geom_angle 
 _geom_angle_site_symmetry_1 
 _geom_angle_site_symmetry_3 
 _geom_angle_publ_flag 
H2 C2 C1 127.9 . . ? 
H2 C2 C2 125.8 . 18 ? 
C1 C2 C2 106.3(3) . 18 ? 
C1 N5 N5 106.7(3) . 18 ? 
C1 N5 H2 126.7 . . ? 
N5 N5 H2 126.7 18 . ? 
N1 Cu1 N1 180.0(2) 17 . ? 
N1 Cu1 N1 90.0 17 3 ? 
N1 Cu1 N1 90.0 . 3 ? 
N1 Cu1 N1 90.0 17 19 ? 
N1 Cu1 N1 90.0 . 19 ? 
N1 Cu1 N1 180.00(10) 3 19 ? 
F1 Ti1 F3 180.000(1) . . ? 
F1 Ti1 F2 90.27(9) . . ? 
F3 Ti1 F2 89.73(9) . . ? 
F1 Ti1 F2 90.27(9) . 2_775 ? 
F3 Ti1 F2 89.73(9) . 2_775 ? 
F2 Ti1 F2 179.45(17) . 2_775 ? 
F1 Ti1 F2 90.27(9) . 4_575 ? 
F3 Ti1 F2 89.73(9) . 4_575 ? 
F2 Ti1 F2 89.999(1) . 4_575 ? 
F2 Ti1 F2 89.999(1) 2_775 4_575 ? 
F1 Ti1 F2 90.27(9) . 3_755 ? 
F3 Ti1 F2 89.73(9) . 3_755 ? 
F2 Ti1 F2 89.999(1) . 3_755 ? 
F2 Ti1 F2 89.999(1) 2_775 3_755 ? 
F2 Ti1 F2 179.45(17) 4_575 3_755 ? 
C1 N1 C1 106.9(3) . 18 ? 
C1 N1 Cu1 126.56(17) . . ? 
C1 N1 Cu1 126.56(17) 18 . ? 
C2 C1 N5 0.3(5) . . ? 
C2 C1 N1 110.2(4) . . ? 
N5 C1 N1 109.9(4) . . ? 
C2 C1 H1 124.9 . . ? 
N5 C1 H1 125.2 . . ? 
N1 C1 H1 124.9 . . ? 
N11 C10 N10 107.8(6) . . ? 
N11 C10 H10A 126.1 . . ? 
N10 C10 H10A 126.1 . . ? 
C12 C11 N11 107.8(6) . . ? 
C12 C11 H11A 126.1 . . ? 
N11 C11 H11A 126.1 . . ? 
N10 C12 C11 108.0(6) . . ? 
N10 C12 H12 126.0 . . ? 
C11 C12 H12 126.0 . . ? 
C12 N10 C10 108.1(6) . . ? 
C12 N10 H10 125.9 . . ? 
C10 N10 H10 125.9 . . ? 
C10 N11 C11 108.1(6) . . ? 
C10 N11 H11 125.9 . . ? 
C11 N11 H11 125.9 . . ? 
 
loop_ 
 _geom_hbond_atom_site_label_D 
 _geom_hbond_atom_site_label_H 
 _geom_hbond_atom_site_label_A 
 _geom_hbond_distance_DH 
 _geom_hbond_distance_HA 
 _geom_hbond_distance_DA 
 _geom_hbond_angle_DHA 
 _geom_hbond_site_symmetry_A 
N5 H2 F2  0.86 2.42 3.119(7) 139.3 26_445 
N5 H2 F3  0.86 2.43 3.232(5) 156.2 25_665 
N10 H10 F2  0.86 2.08 2.88(2) 153.4 28_545 
N10 H10 F2  0.86 2.40 3.02(2) 128.9 25_565 
N11 H11 F2  0.86 1.98 2.80(3) 158.8 26_445 
 
_diffrn_measured_fraction_theta_max    0.966 
_diffrn_reflns_theta_full              27.78 
_diffrn_measured_fraction_theta_full   0.966 
_refine_diff_density_max    0.488 
_refine_diff_density_min   -0.432 
_refine_diff_density_rms    0.070 
